# Supplementary material for: Drawing in poly(ε-caprolactone) fibers: tuning mechanics, fiber dimensions and surface-modification density
Source: Royal Society of Chemistry journal article supplement (doi:10.1039/c7tb00096k), 2017-01-01
Supplement: c7tb00096k1.pdf [file c7tb00096k1.pdf]

## Supporting information

### Drawing in poly ( $\epsilon$ -caprolactone) Fibers: Tuning Mechanics, Fiber Dimensions and Surface-Modification for Biomedical Applications

Si-Eun Kim, Alex M. Jordan, LaShanda T.J. Korley and Jonathan K. Pokorski\*

Department of Macromolecular Science and Engineering, Case Western Reserve University, Cleveland,  
Ohio 44106-7202, United States

\*Email - jon.pokorski@case.edu

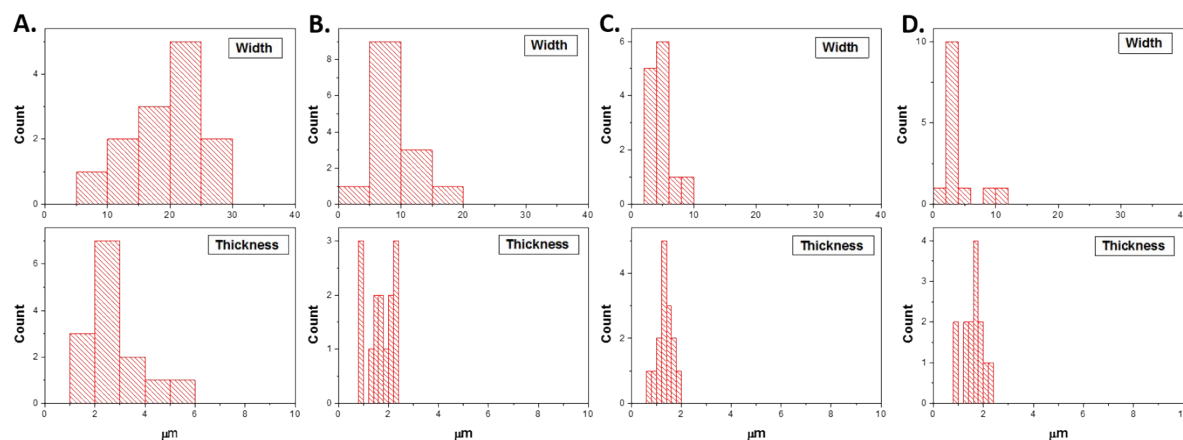

**Figure S1.** Size distribution of PCL fiber width and thickness with varying drawing ratios from A; DR=1, B; DR=3, C; DR=5 and D; DR=7.
